# Supplementary material for: Ketogenic diet restrains aging-induced exacerbation of coronavirus infection in mice
Source: eLife journal article supplement (doi:10.7554/elife.66522), 2021-06-21

A

|            |   |   |   |   |   |    |
|------------|---|---|---|---|---|----|
| BHB (mM)   | - | - | - | 1 | 5 | 10 |
| A59 (mCoV) | - | - | + | + | + | +  |
| ATP        | - | + | - | - | - | -  |
| LPS        | + | + | + | + | + | +  |

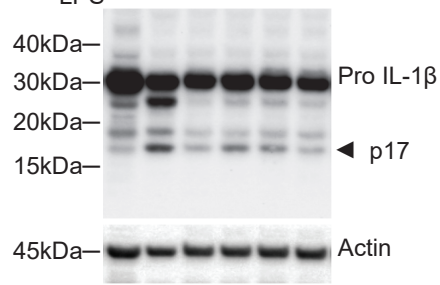

B

|            |   |   |   |   |   |    |
|------------|---|---|---|---|---|----|
| BHB (mM)   | - | - | - | 1 | 5 | 10 |
| A59 (mCoV) | - | - | + | + | + | +  |
| ATP        | - | + | - | - | - | -  |
| Pam3CSK4   | + | + | + | + | + | +  |

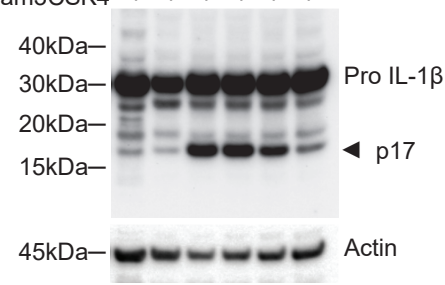

C

BHB

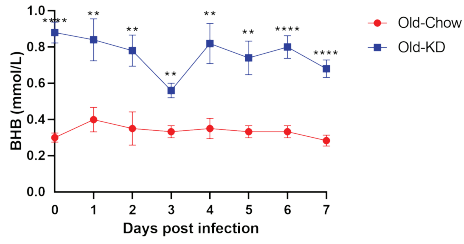

D

Food intake/day

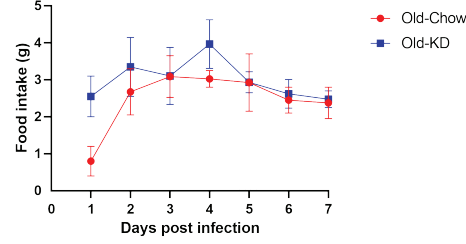

E

Glucose

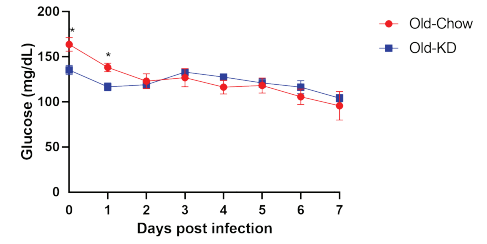

F

Temperature

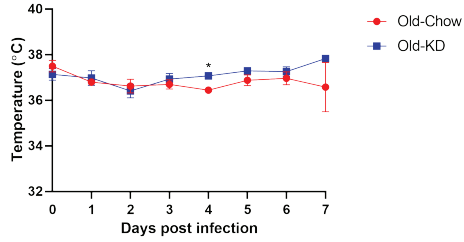

G

Heart rate

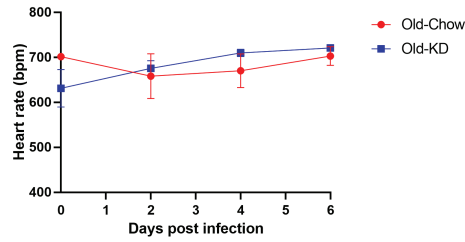

H

Breath rate

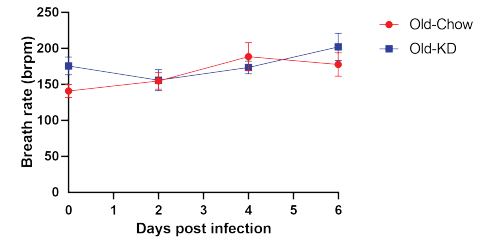

I

Pulse distention

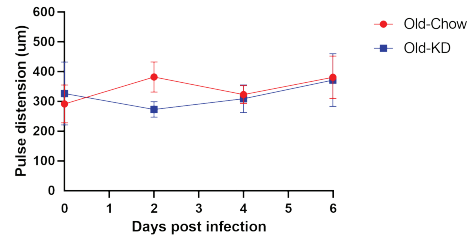

Supplement: supp [file elife-66522-supp-v1.zip]
