# Supplementary figures and images for: Ketogenic diet restrains aging-induced exacerbation of coronavirus infection in mice
Source: eLife journal article supplement (doi:10.7554/elife.66522), 2021-06-21

A

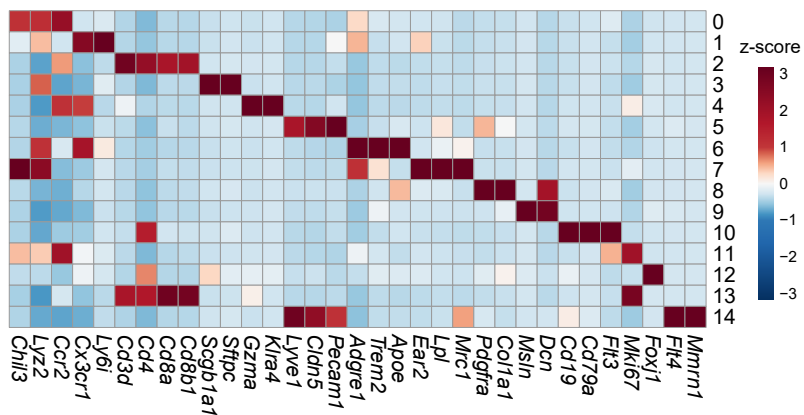

B

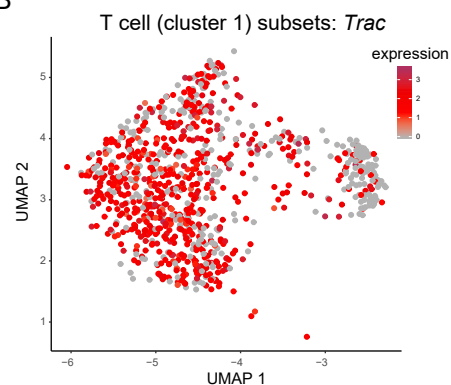

C

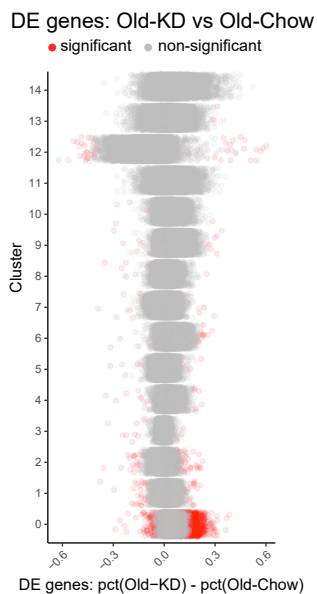

D

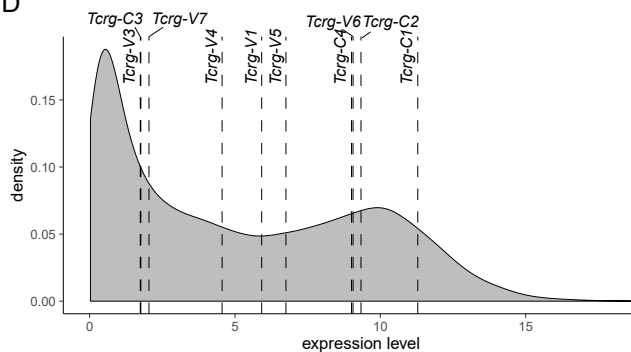

E

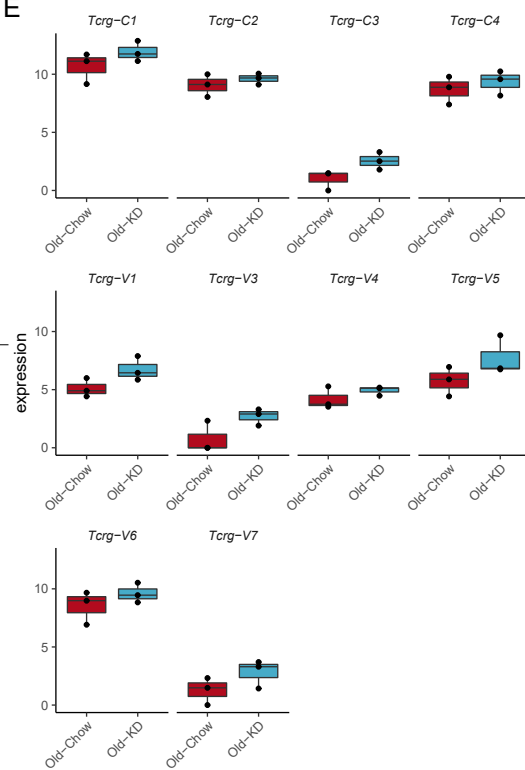

F

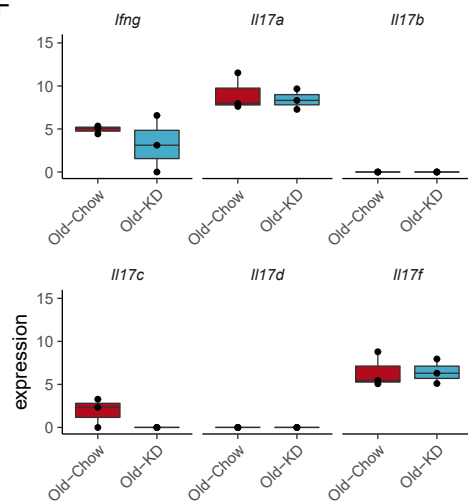

G

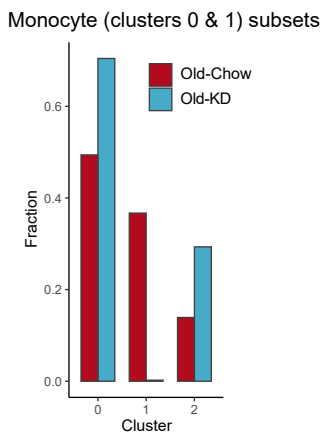

H

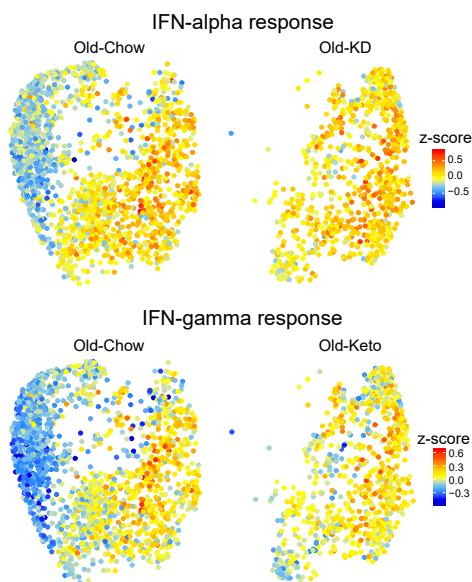

I

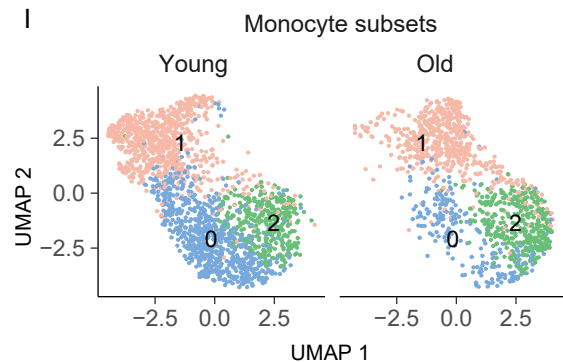

J

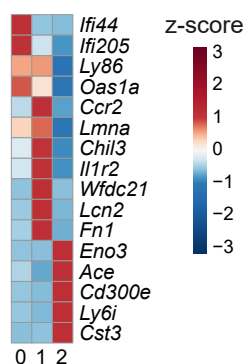

K

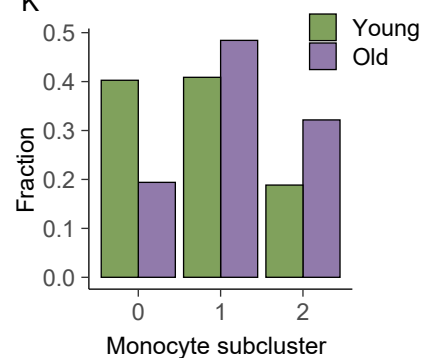

Supplement: supp [file elife-66522-supp-v1.zip]

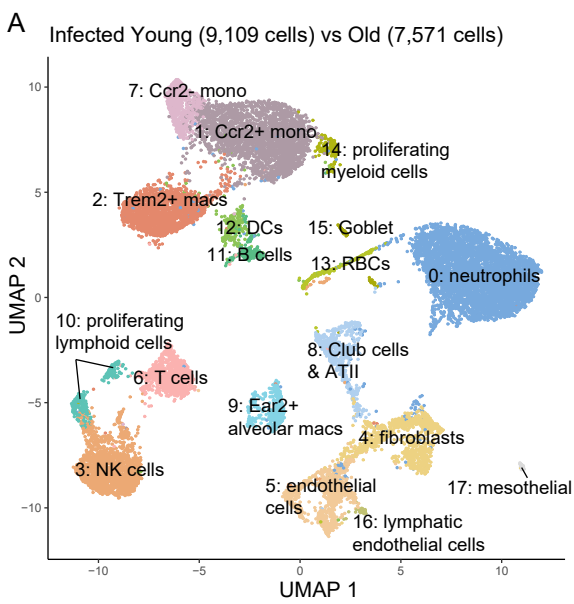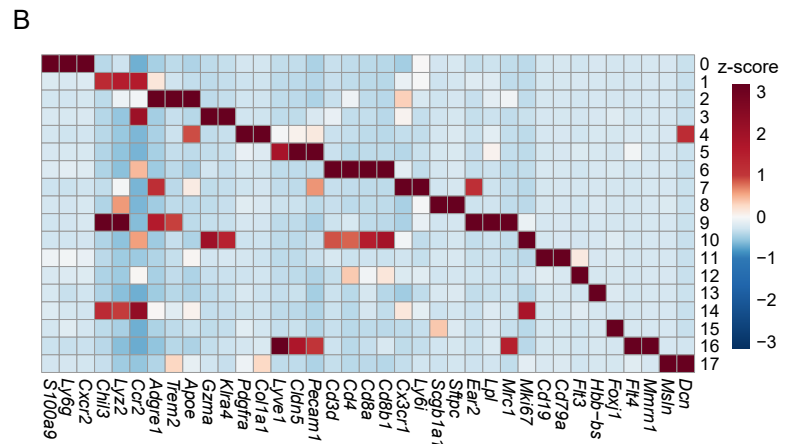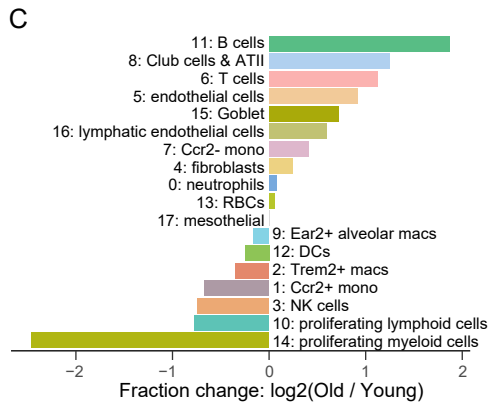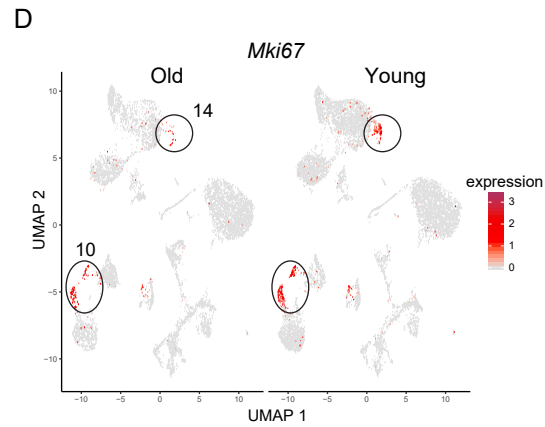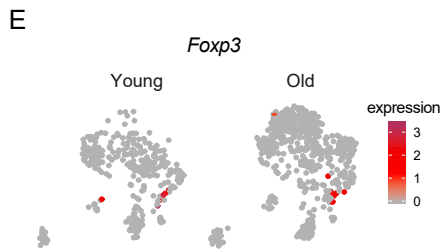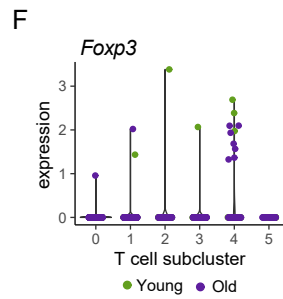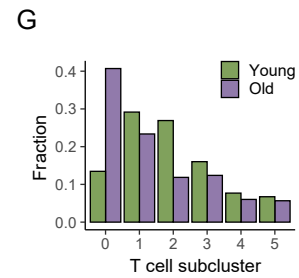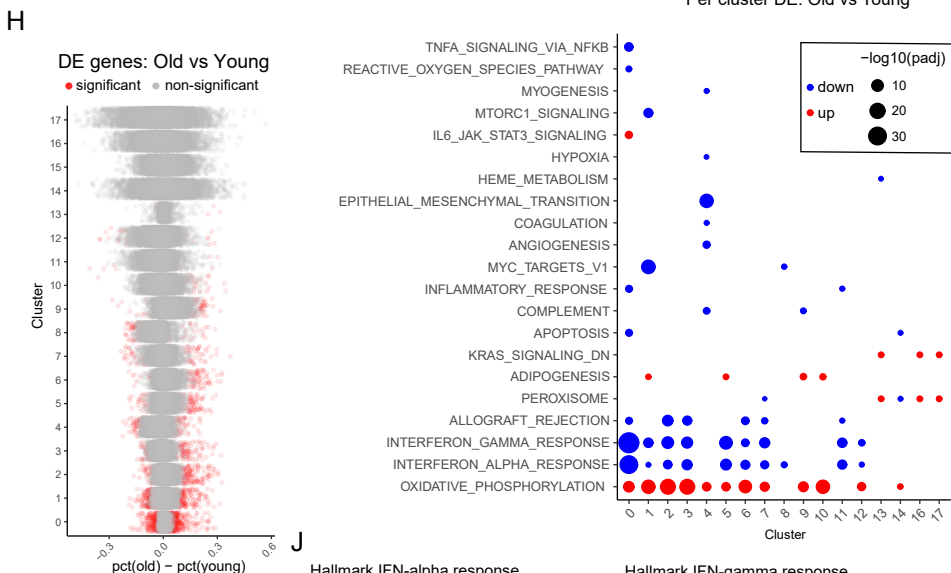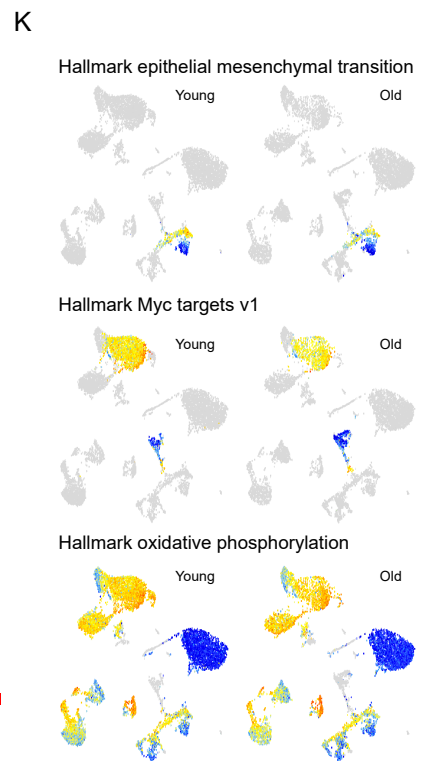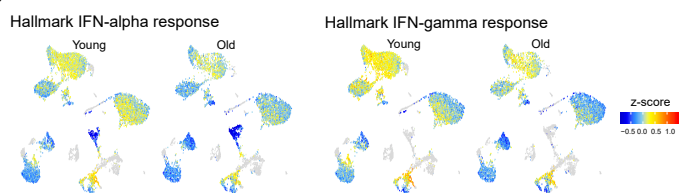

Supplement: supp [file elife-66522-supp-v1.zip]

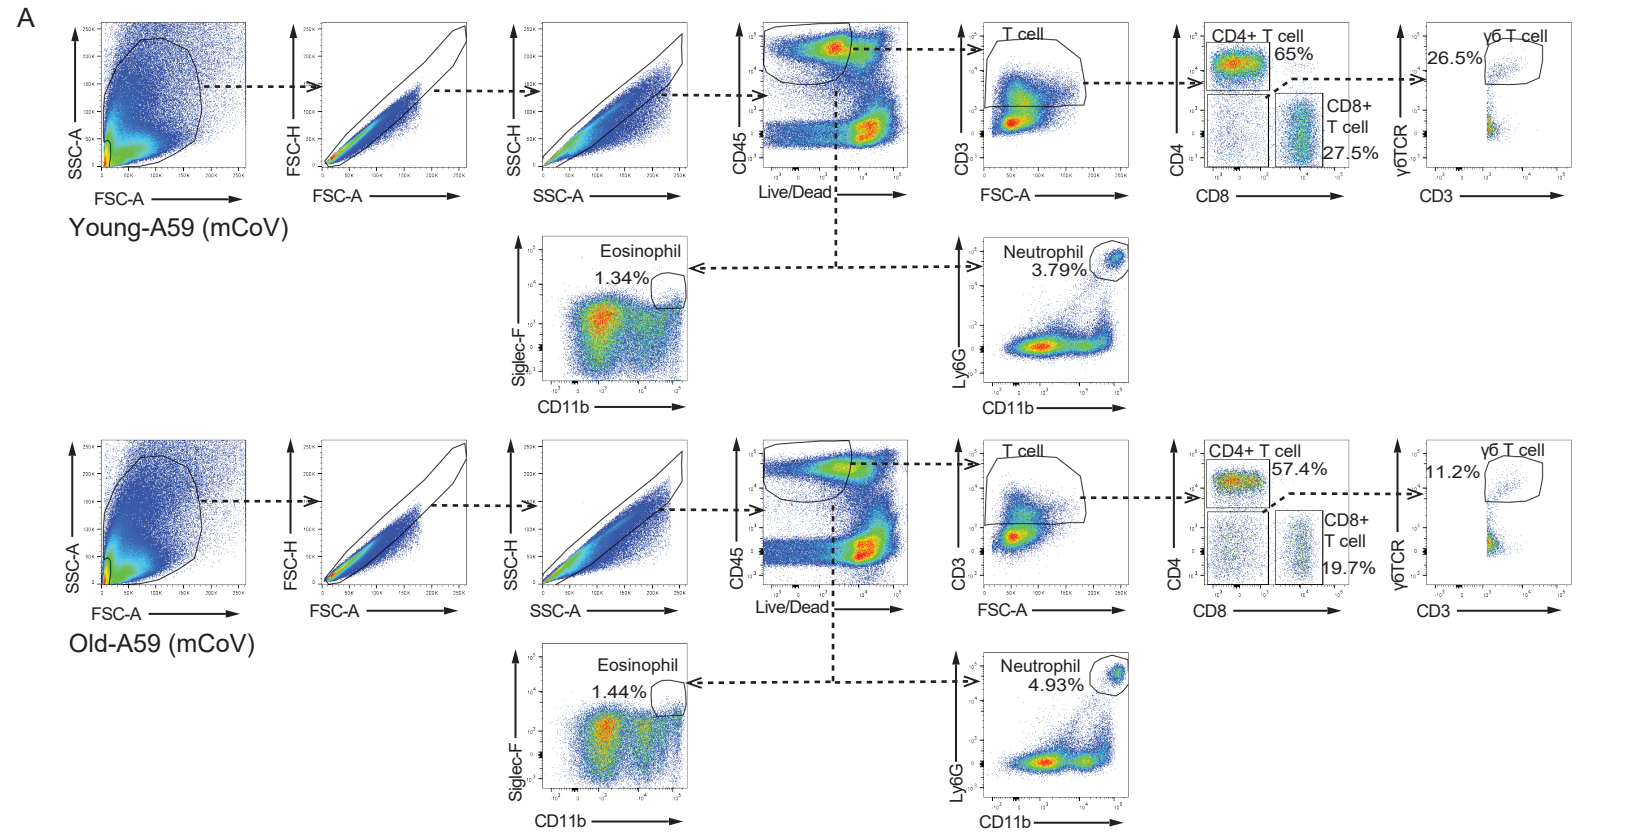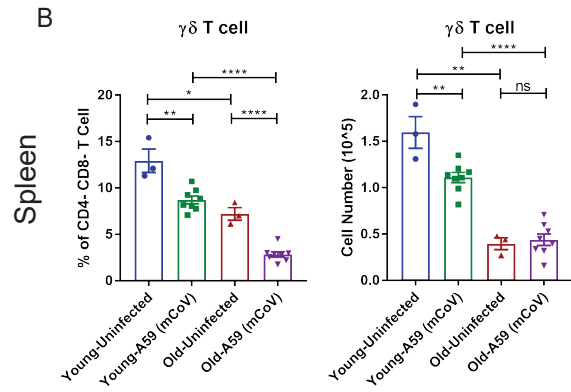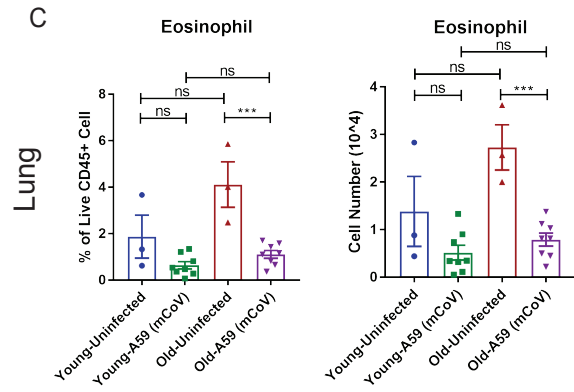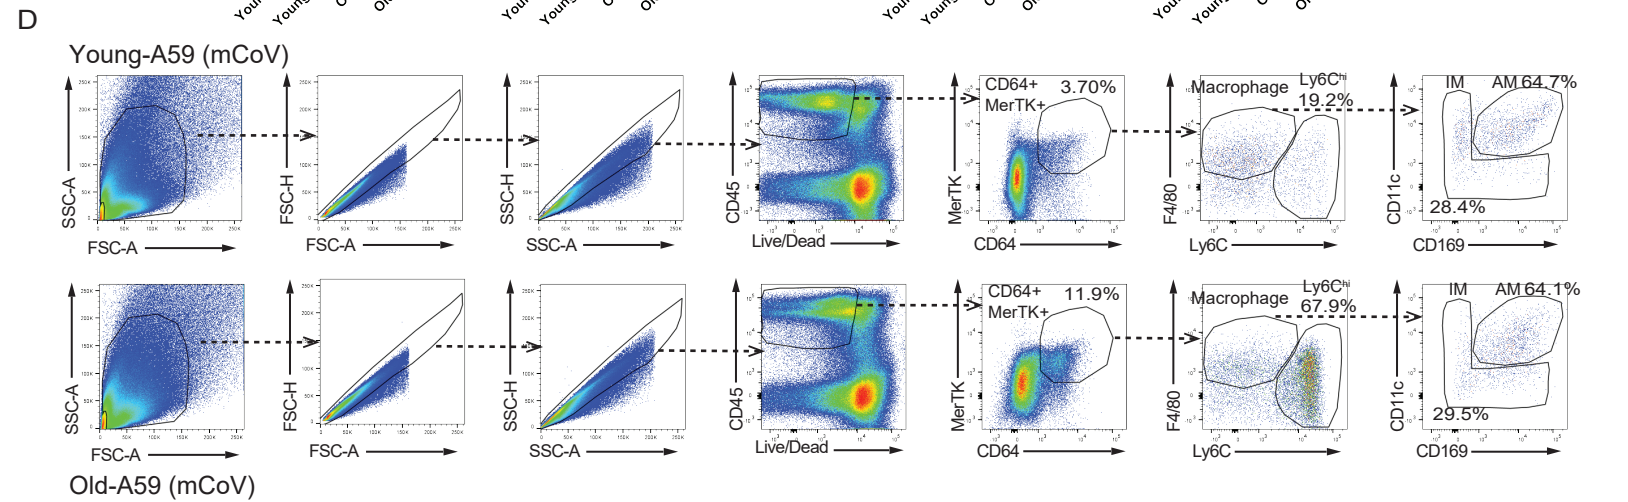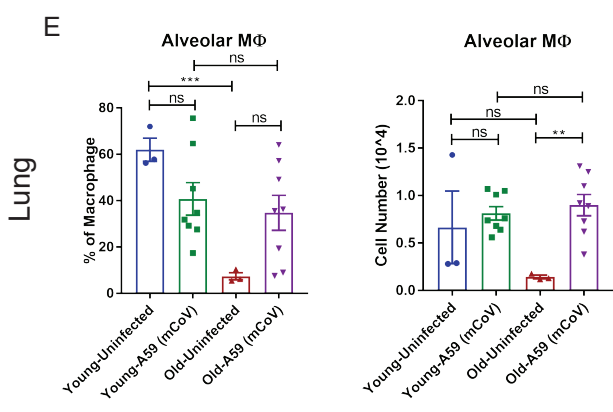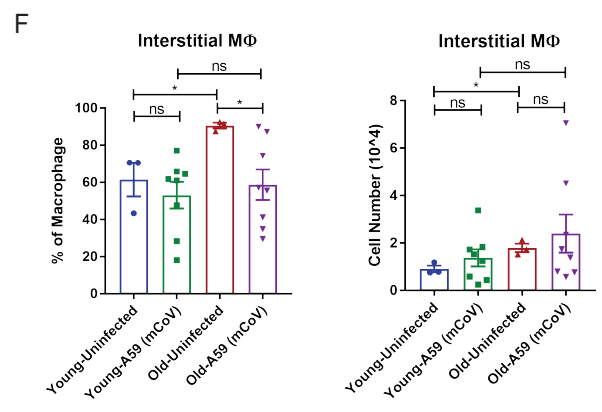

Supplement: supp [file elife-66522-supp-v1.zip]

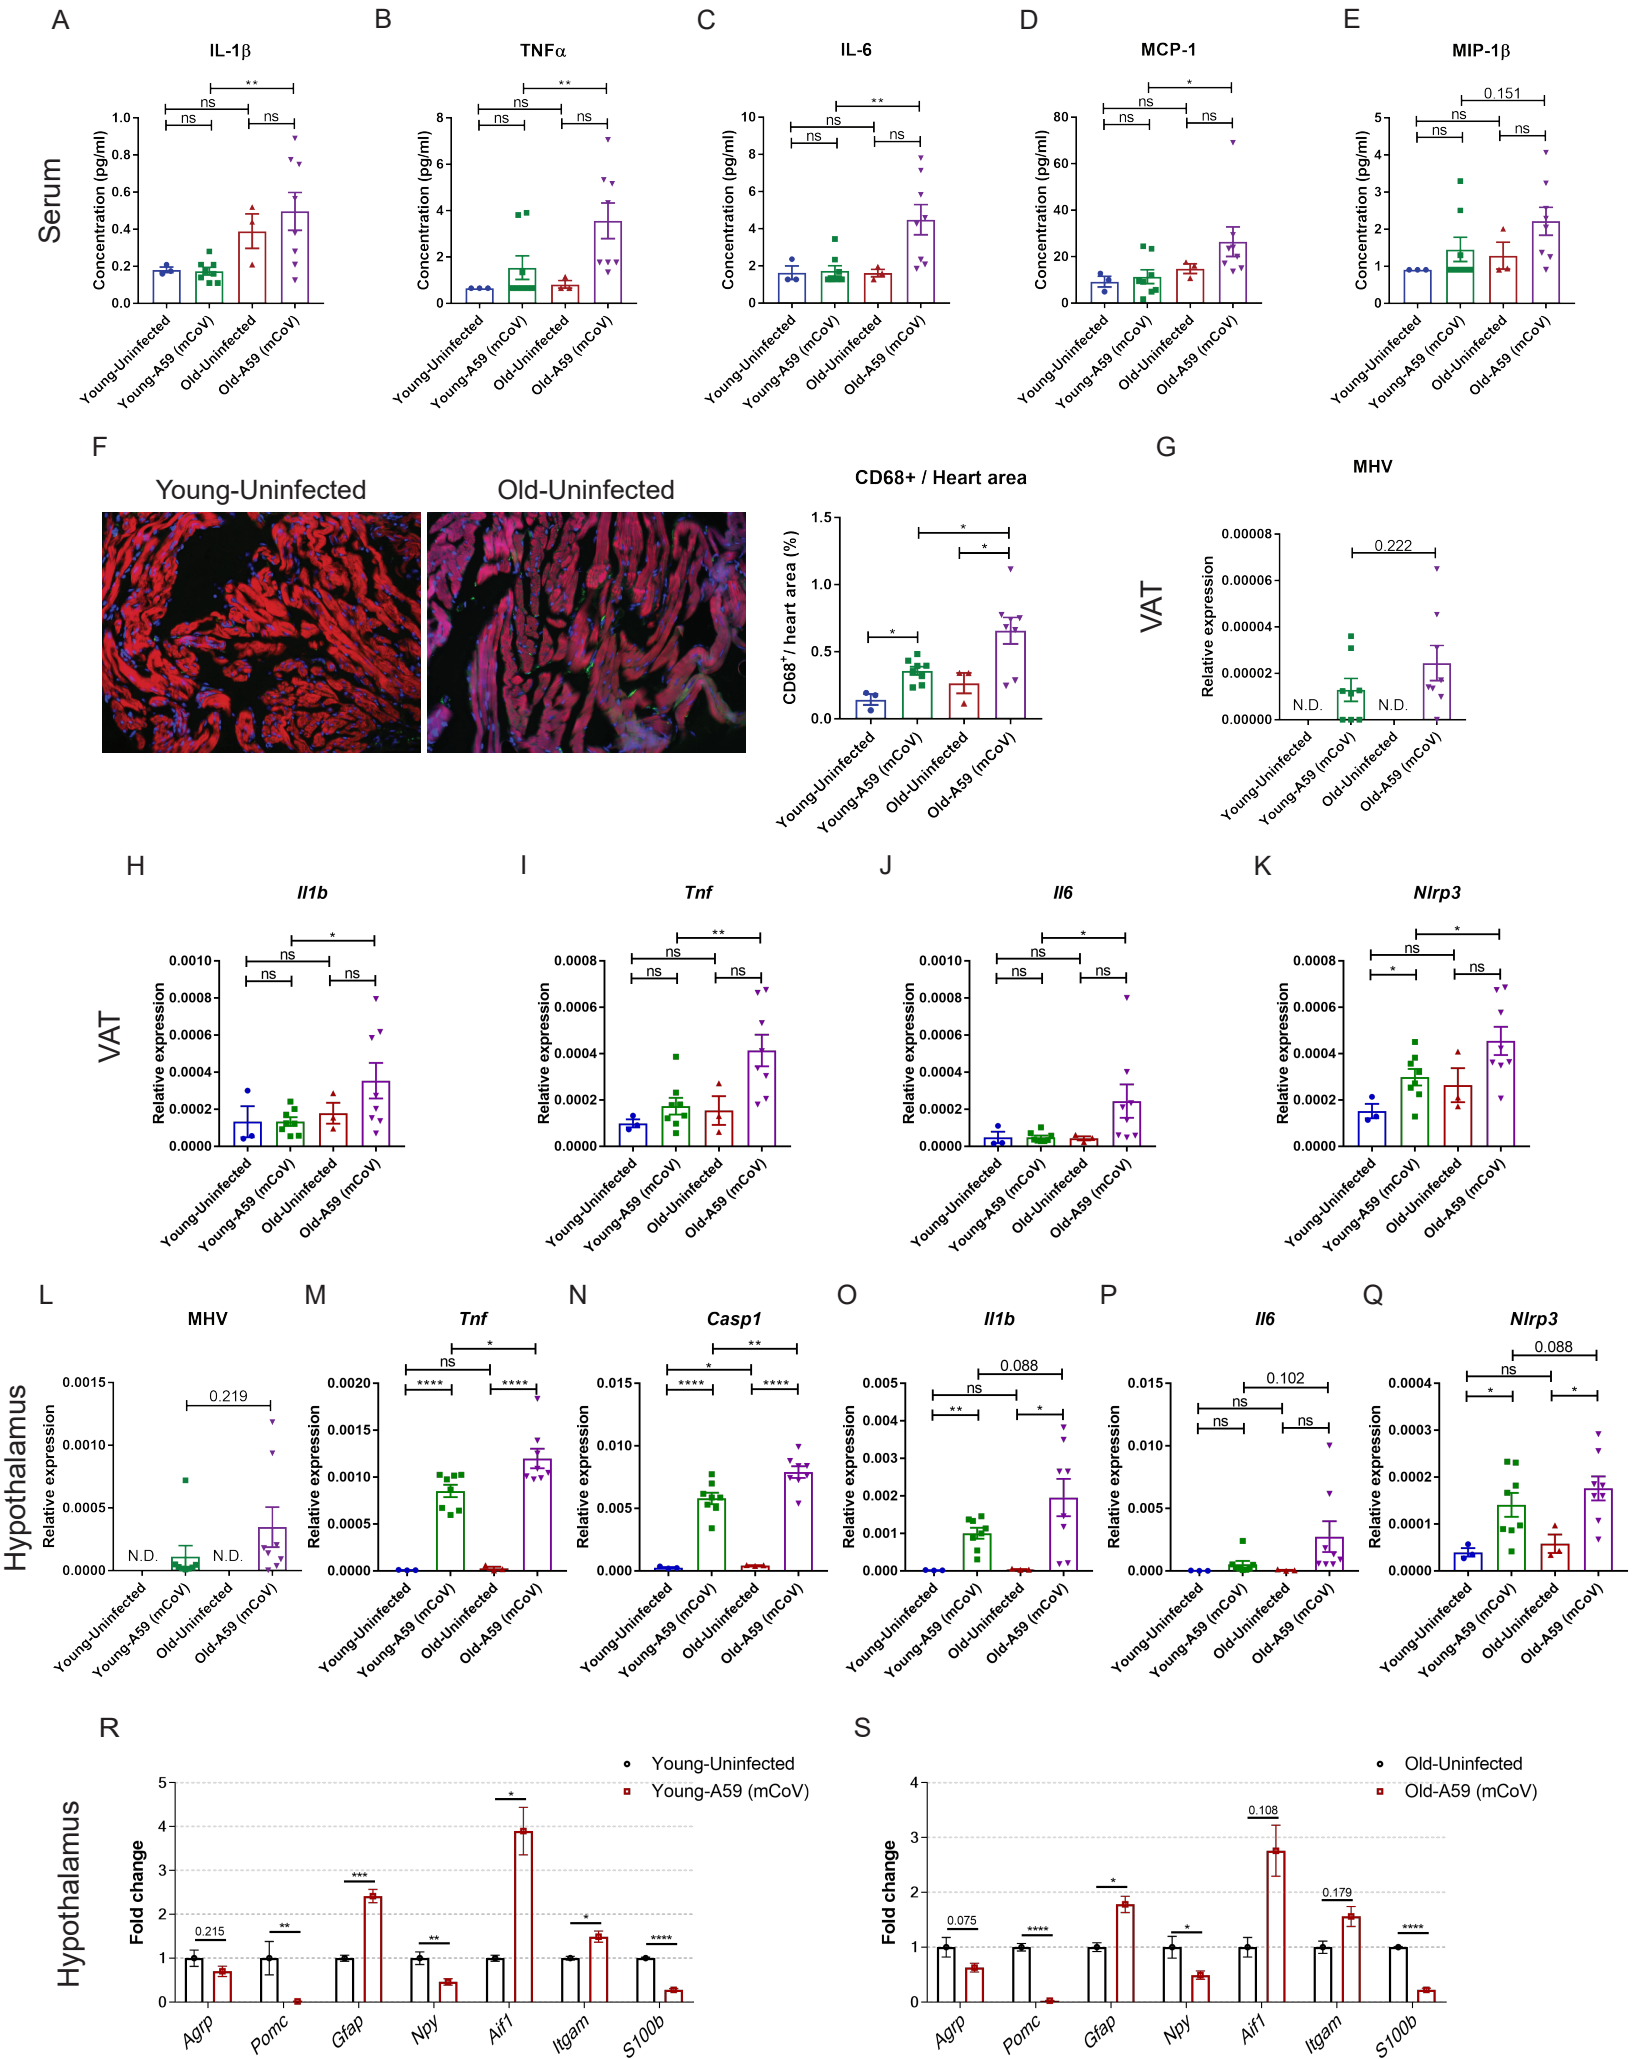

Supplement: supp [file elife-66522-supp-v1.zip]

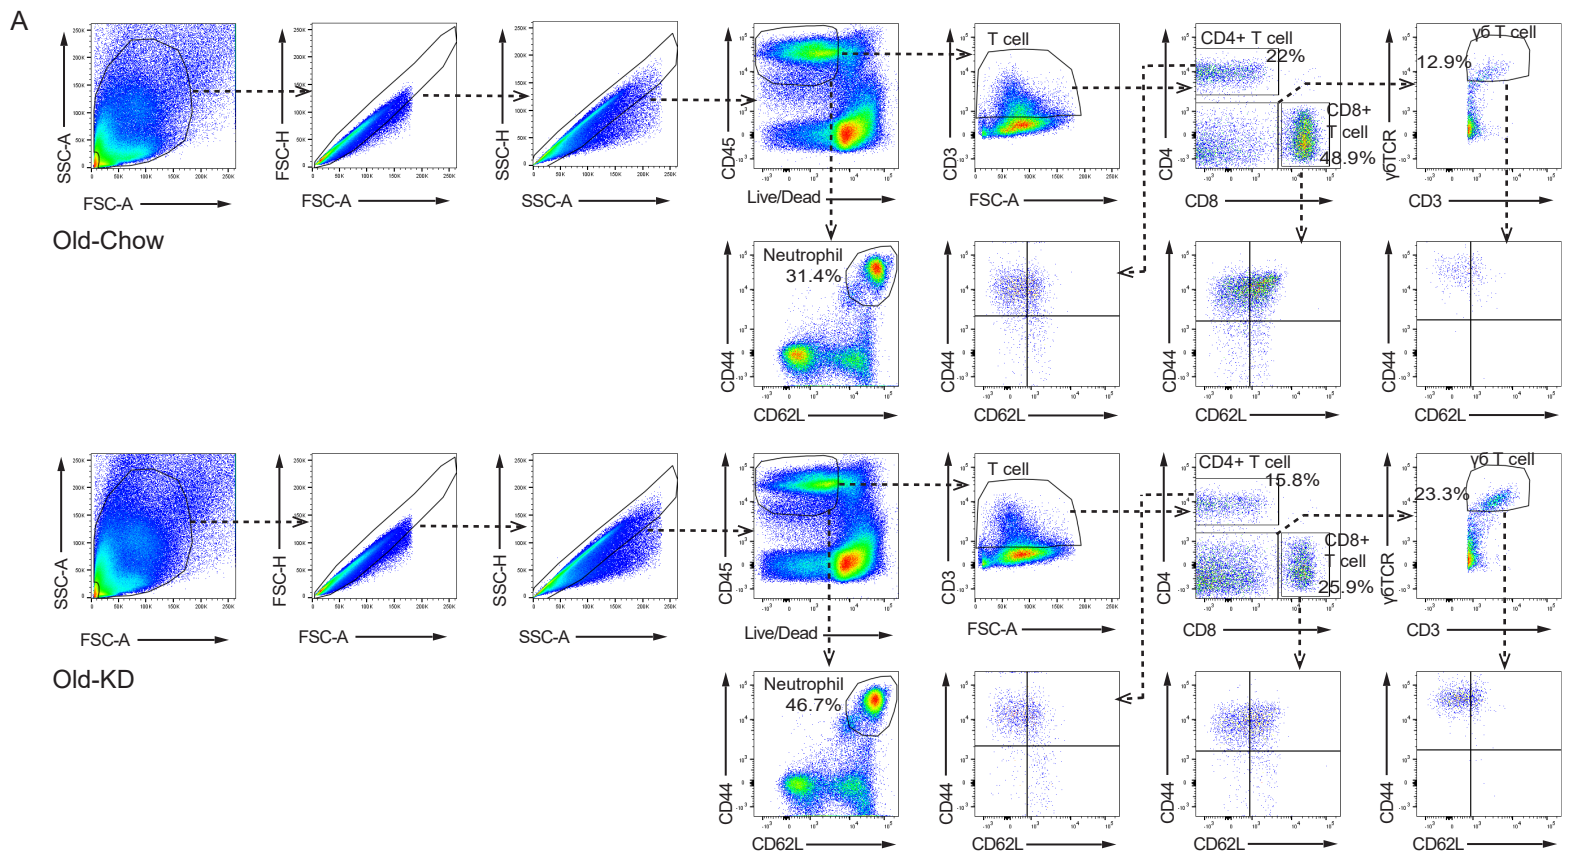

**B**

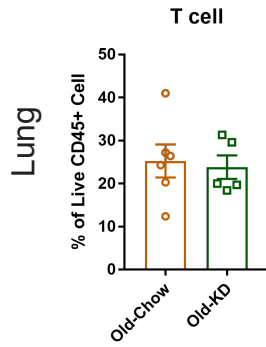

**C**

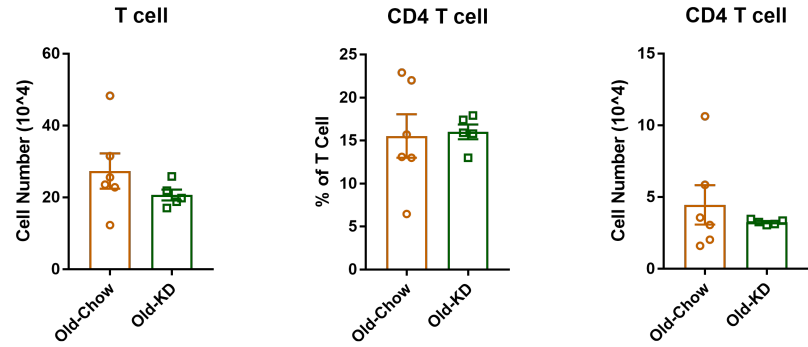

**D**

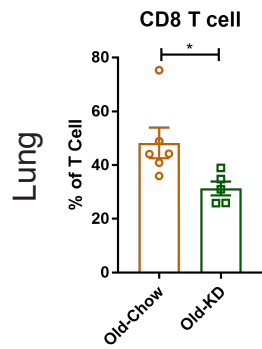

**E**

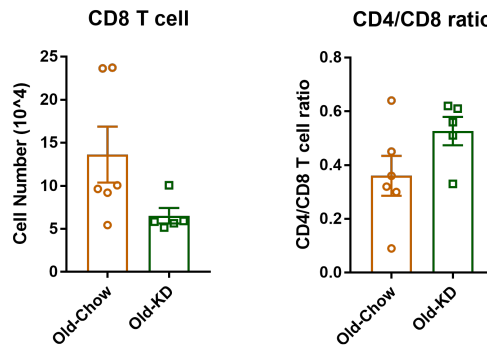

**F**

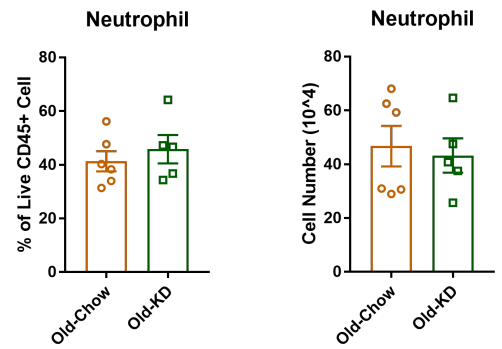

**G**

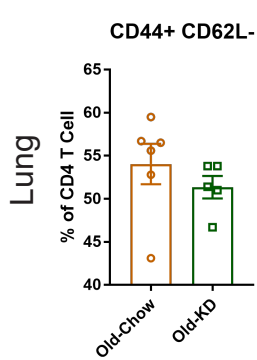

**H**

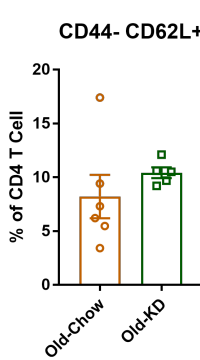

**I**

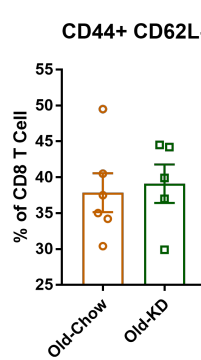

**J**

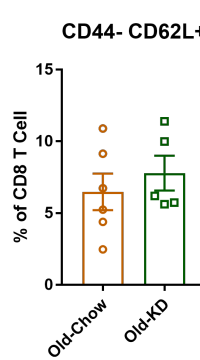

**K**

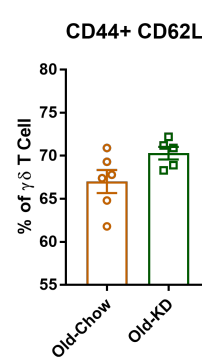

**L**

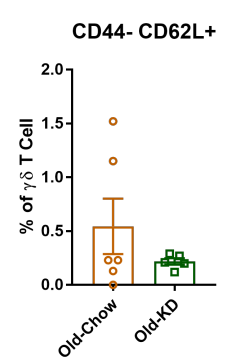

Supplement: supp [file elife-66522-supp-v1.zip]

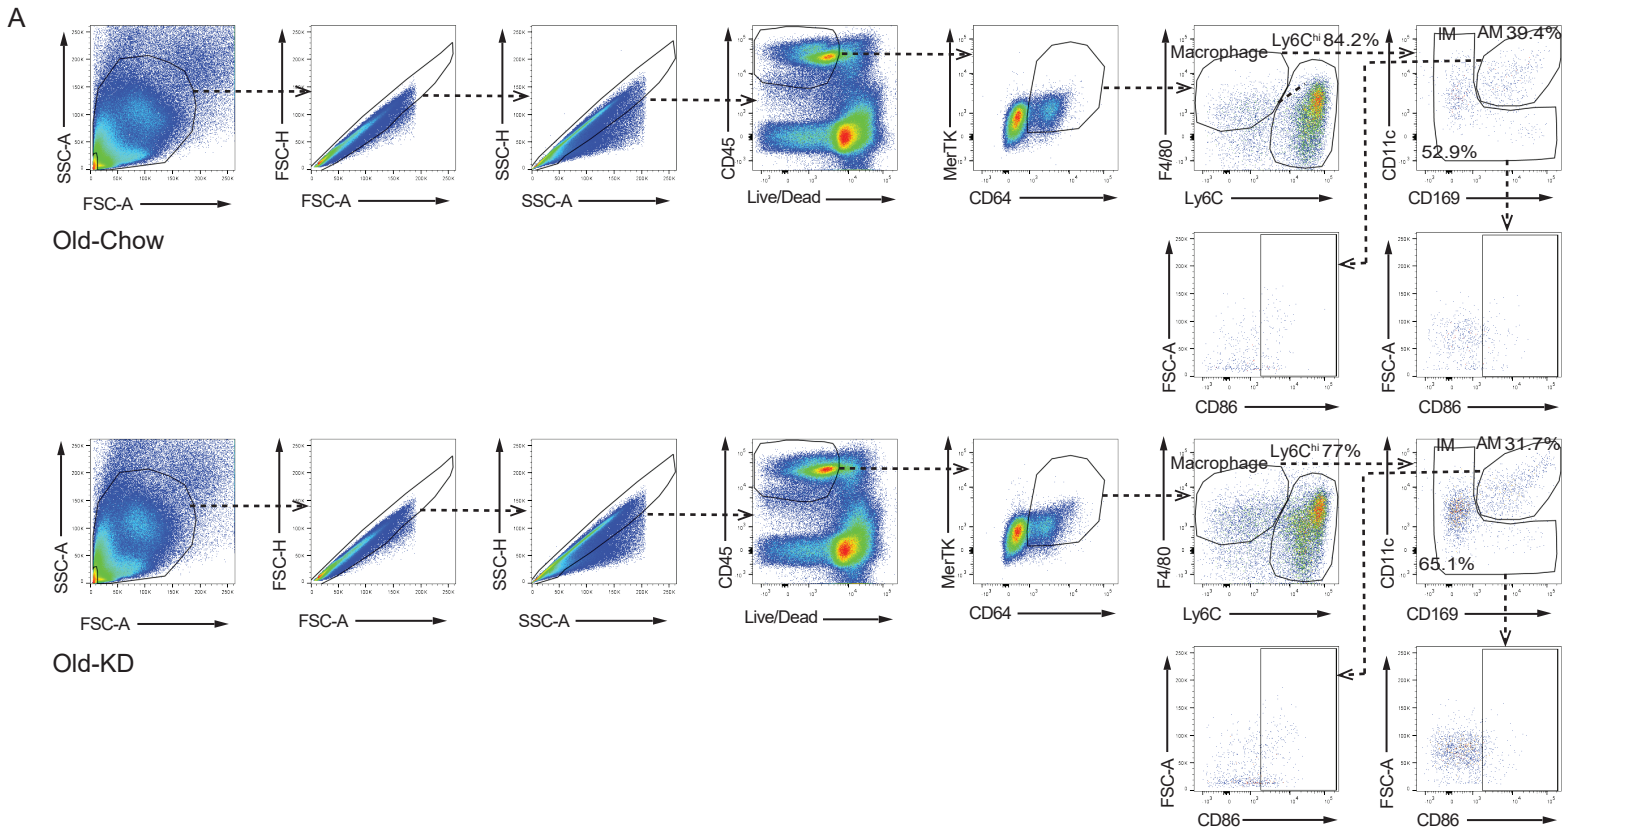

**B**

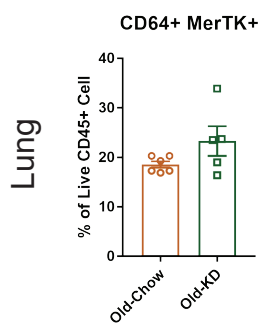

**C**

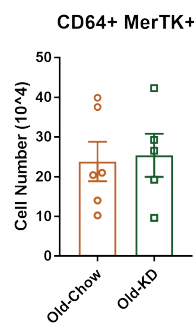

**D**

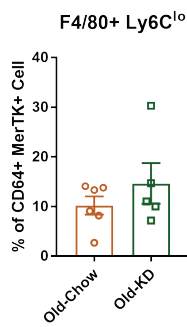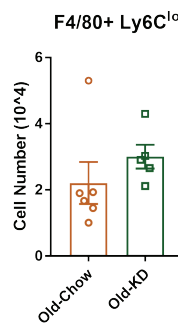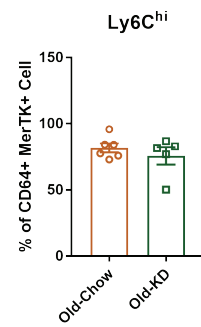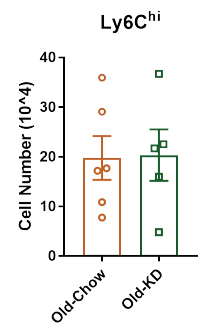

**E**

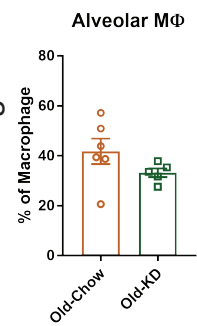

**F**

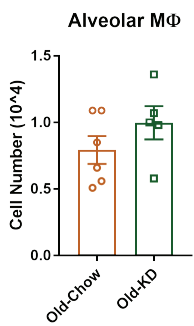

**G**

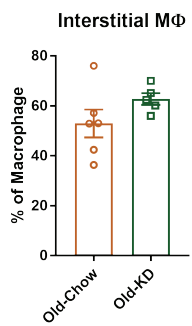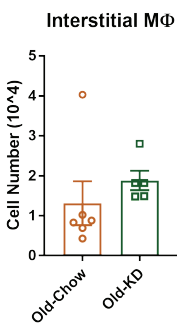

**H**

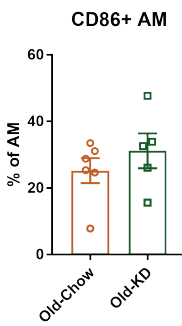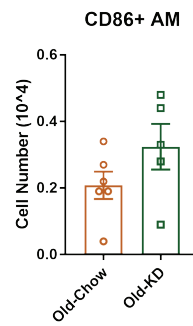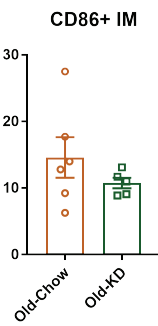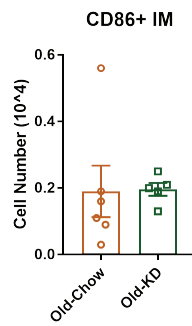

Supplement: supp [file elife-66522-supp-v1.zip]
